# Supplementary material for: A Systematic Review of Autologous Platelet-Rich Plasma and Fat Graft Preparation Methods
Source: PubMed Central journal article supplement — Plast Reconstr Surg Glob Open. 2017 Dec 6;5(12):e1596. doi: 10.1097/GOX.0000000000001596 (PMC5889438; doi:10.1097/gox.0000000000001596), 2017-12-06
Supplement: gox-5-e1596-s001.pdf [file gox-5-e1596-s001.pdf]

## SDC 1: Electronic database search matrix

|                              |    | <b>Concept 1</b>        | AND | <b>Concept 2</b>   | AND | <b>Concept 3</b> |
|------------------------------|----|-------------------------|-----|--------------------|-----|------------------|
| <b>MeSH Subject Headings</b> | OR | Platelet Activation     |     |                    |     |                  |
|                              | OR | Platelet Rich Plasma    |     |                    |     |                  |
| <b>Keywords</b>              | OR | Platelet Rich Plasma    |     | Fat Graft(s)       |     | Mixed            |
|                              | OR | Platelet-Rich Plasma    |     | Fat Injection(s)   |     | Mixing           |
|                              | OR | PRP                     |     | Grafted Fat        |     | Mix              |
|                              | OR | Platelet concentrate(s) |     | Free Fat Graft (s) |     | Method(s)        |
|                              | OR |                         |     | Fat Grafting       |     | Extraction       |
|                              | OR |                         |     | Fat Transfer       |     | Preparation      |
|                              | OR |                         |     | Fat Transplant     |     | Activated        |
|                              | OR |                         |     | Lipofilling        |     | Activation       |
|                              | OR |                         |     | Lipomodelling      |     | Human            |
|                              | OR |                         |     |                    |     | Animal           |
|                              | OR |                         |     |                    |     | Autologous       |
